# Supplementary material for: Surface-enhanced Raman scattering substrate based on cysteamine-modified gold nanoparticle aggregation for highly sensitive pentachlorophenol detection
Source: Royal Society of Chemistry journal article supplement (doi:10.1039/c6ra15774b), 2016-01-01
Supplement: c6ra15774b1.pdf [file c6ra15774b1.pdf]

**Supporting information :**

**Surface-enhanced Raman Scattering Substrate based on Cysteamine-Modified Gold Nanoparticles Aggregation for Highly Sensitive Pentachlorophenol Detection**

Qian Ma,<sup>a, b</sup> Hongyan Zhang,<sup>\* a</sup> Weimin Liu,<sup>a</sup> Jiechao Ge,<sup>a</sup> Jiasheng Wu,<sup>a</sup> Shujun Wang,<sup>\* b</sup> Pengfei Wang<sup>a</sup>

<sup>a</sup> Key Laboratory of Photochemical Conversion and Optoelectronic Materials, Technical Institute of Physics and Chemistry, Chinese Academy of Sciences, Beijing, 100190, China;

<sup>b</sup> Beijing Key Laboratory of Optical Detection Technology for Oil and Gas, China University of Petroleum, Beijing 102249, China

Email: zhanghongyan@mail.ipc.ac.cn; ajuwang008@hotmail.com

## 1. The characterization of the AuNPs

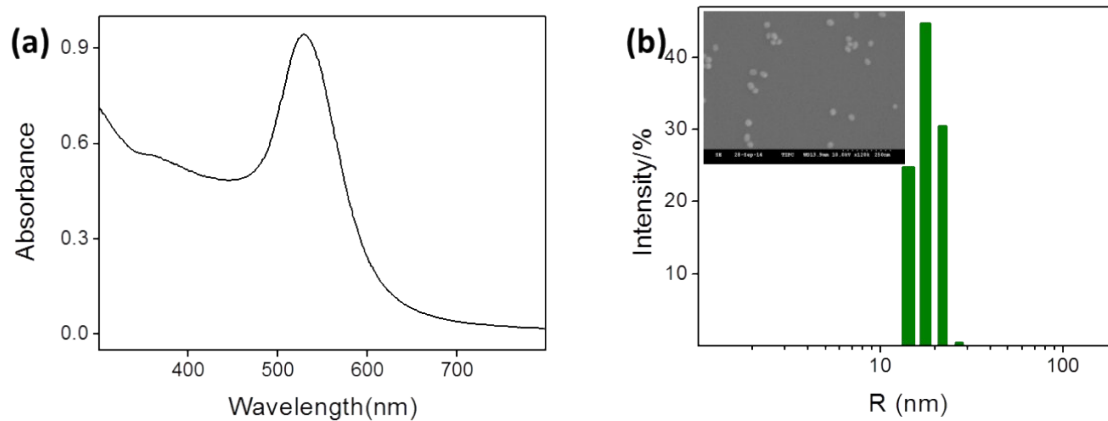

**Figure. S1** The AuNPs characterization: (a) UV-vis spectrum of AuNPs; (b) Histogram of size distribution of AuNPs; inset SEM image of AuNPs.

## 2. SEM image of the substrate after modification of AuNPs

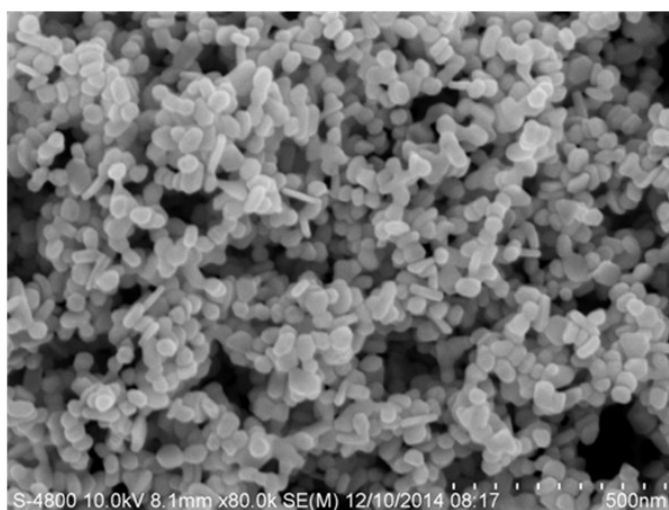

**Figure. S2** SEM image of AuNPs immobilized on the substrate.

### 3. The optimization of the cysteamine concentrations.

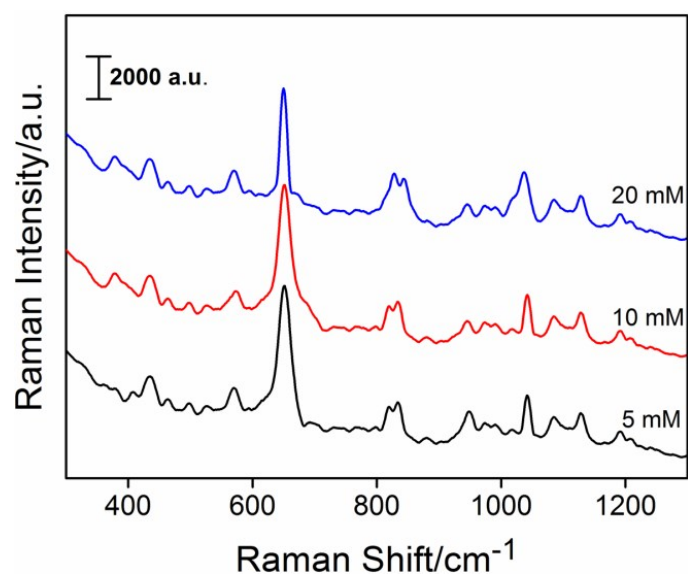

**Figure. S3** The SERS spectra of the substrate immersed in 5 mM (black line), 10 mM (red line) and 20 mM (blue line) concentrations of cysteamine hydrochloride solution for 12 h.

### 4. The optimization of the modification time in cysteamine solution (20 mM).

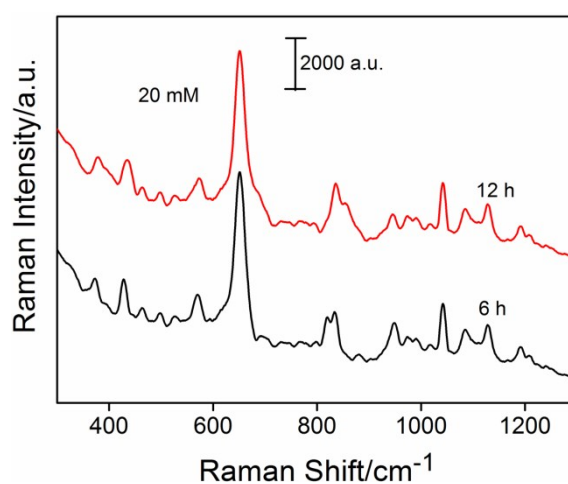

**Figure. S4** SERS spectra of the substrate immersed in 20 mM Cys solution for 12 h (red line) and 6 h (black line).

**5. SERS spectra of PCP on the cysteamine modified and unmodified substrate and enhancement factor calculation of SERS for Figure 3.**

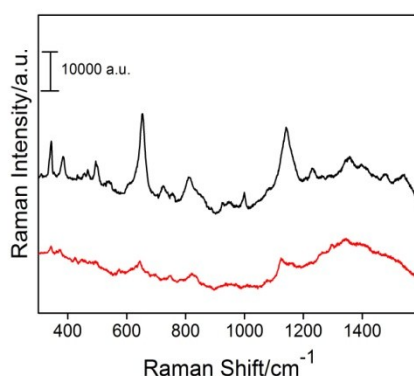

**Figure. S5** SERS spectrum of PCP on cysteamine-modified AuNPs substrate (red) and Raman spectrum of PCP on plain glass for comparison (black).

**Calculation of Enhancement Factor according to the data as shown in Figure 3**

The SERS enhancement factors of PCP molecules on Cys-modified AuNPs substrate and bare AuNPs were estimated according to the following expression:

$$EF = (I_{SERS}/I_{solution}) \times (N_{solution}/N_{SERS}) \quad (1)$$

where  $N_{solution}$  and  $N_{SERS}$  are the numbers of PCP molecules in a reference of 50  $\mu$ M PCP in bare AuNPs and on the surface of SERS substrate;  $I_{solution}$  and  $I_{SERS}$  are the single intensities of PCP molecule Raman spectra probed in bare AuNPs (50  $\mu$ M) and on the surface of single Cys-modified AuNP.<sup>1</sup>

Firstly, laser spot size has been calculated. The simplified equation to calculate the diameter of the focused laser spot is:

$$d = 0.61\lambda/NA \quad (2)$$

The above equation is extracted from Renishaw notes of the Spectroscopy Products Division; SPD/PN/088 Issue 1.1 June 2003)

Where  $d$  is diameter of laser spot size (beam diameter);  $\lambda$  is wavelength of the laser beam which is 785 nm in the present study;  $NA$  is numerical aperture. In the present study, 20  $\times$  objective was used through the experiment.

Thus,  $NA = 0.4$  (Renishaw standard)

Spot size,  $d = 0.61 \times 0.785 / 0.4 = 1.197 \mu\text{m}$

Radius =  $0.6 \mu\text{m}$

Illuminated area =  $0.6 \times 0.6 \times 3.14 = 1.13 \mu\text{m}^2$

The depth of field penetration of laser into the sample ( $h$ ) is determined by the excitation line ( $\lambda$ ), the refractive index of surrounding media ( $n$ ), and  $NA$ .<sup>2</sup>

$$h = n \frac{\lambda}{NA^2} = 1.33 \times 0.785 \div (0.4)^2 = 6.525 \mu\text{m} \quad (3)$$

The effective excitation volume of the PCP in bare AuNPs (50  $\mu\text{M}$  concentration) probed with the Raman microscope using 20  $\times$  objective was:

$$V = \pi r^2 h = 3.14 \times 0.6 \times 0.6 \times 6.525 = 7.38 \mu\text{m}^3 \quad (4)$$

Thus, the number of PCP molecules was:

$$N_{\text{solution}} = 6.02 \times 10^{23} \times 50 \times 10^{-6} \text{M} \times 7.38 \mu\text{m}^3 = 2.22 \times 10^{11} \quad (5)$$

The SERS signal intensity of probed PCP molecules on SERS substrate was estimated from the height of Raman spectra peak at 649  $\text{cm}^{-1}$ . Onto the SERS substrate with size of 20 mm  $\times$  20 mm, 1 mL of 50  $\mu\text{M}$  PCP solution was added. Assuming about 10% of the PCP molecules was retained after rinsing the substrate.<sup>3-4</sup> Thus, the total number of PCP molecules can be estimated as:

$$N_{\text{PCP-all}} = 1 \text{ mL} \times 10^{-3} \frac{\text{L}}{\text{mL}} \times 50 \times 10^{-6} \text{M} \times 6.02 \times 10^{23} \times 10\% = 3.01 \times 10^{15} \quad (6)$$

The number of active PCP molecules when laser illuminates the sample is:

$$N_{\text{SERS}} = \frac{\pi r^2}{a^2} N_{\text{PCP-all}} = \frac{3.14 \times 0.6 \mu\text{m} \times 0.6 \mu\text{m}}{20 \text{ mm} \times 20 \text{ mm}} \times 3.01 \times 10^{15} = 8.43 \times 10^6 \quad (7)$$

According to the equation (1), the SERS enhancement factor is:

$$EF = (I_{\text{SERS}}/I_{\text{solution}}) \times (N_{\text{solution}}/N_{\text{SERS}}) = (8706.9/402) \times \left( \frac{2.22 \times 10^{11}}{8.43 \times 10^6} \right) = 5.7 \times 10^5$$

## 6. SERS spectra of PCP on cysteamine and thiol acetic acid modified AuNPs substrate

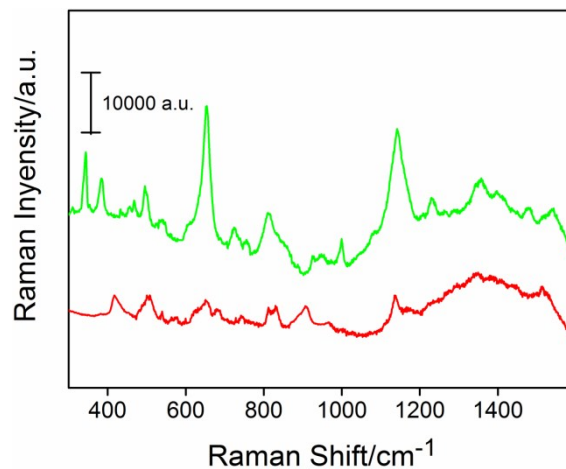

**Figure. S6** SERS spectra of PCP on cysteamine (green line) and thiol acetic acid (red line) modified

substrate.

### 7. Effect of salt concentration on SERS analysis.

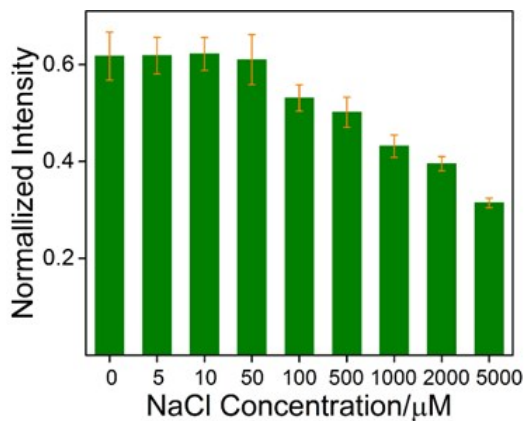

**Figure. S7** The normalized intensity change of PCP (10 μM) at 341cm<sup>-1</sup> with different NaCl concentration and 2h immersion time. The data points correspond to the average ± standard deviation of three measurements.

### 8. Effect of solution pH on SERS analysis.

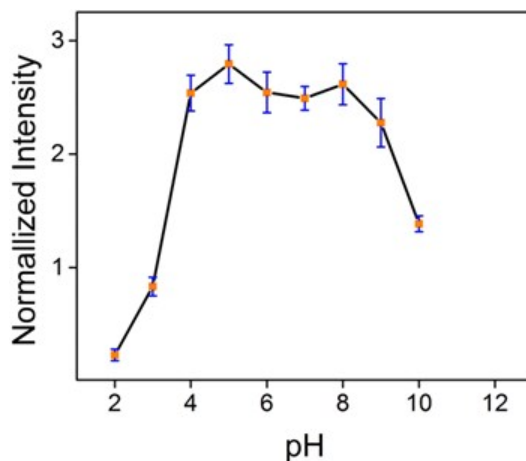

**Figure. S8** The normalized intensity change of PCP (10 μM) at 341cm<sup>-1</sup> with the range of pH range from 2.0 to 10.0 and 2 h immersion time. The data points correspond to the average ± standard deviation of three measurements.

### 9. Kinetics of PCP adsorption on the cysteamine-modified AuNPs substrate.

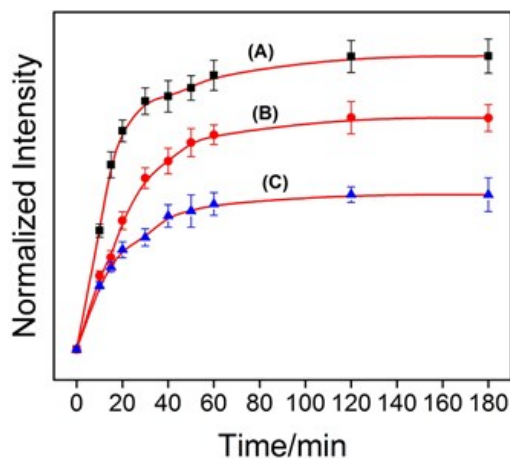

**Figure. S9** Kinetic curve of PCP adsorption onto cysteamine-modified AuNPs substrate (A) 20 μM, (B) 10 μM and (C) 5 μM. The data points correspond to the average ± standard deviation of three measurements.

### 10. SERS detection of PCP in tap water

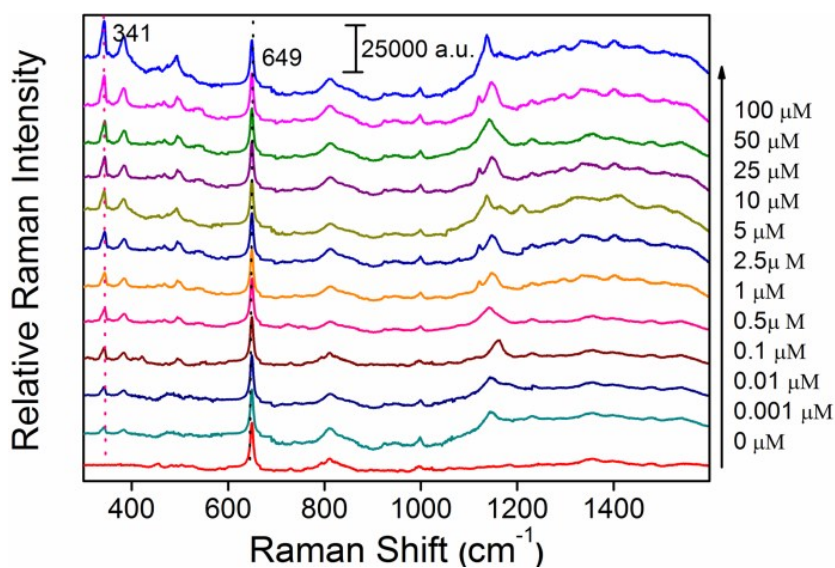

**Figure. S10** The SERS spectra of PCP in tap water on cysteamine modified AuNPs substrate with different concentrations (0-100 μM).

## 11. Log plot for PCP detection in tap water

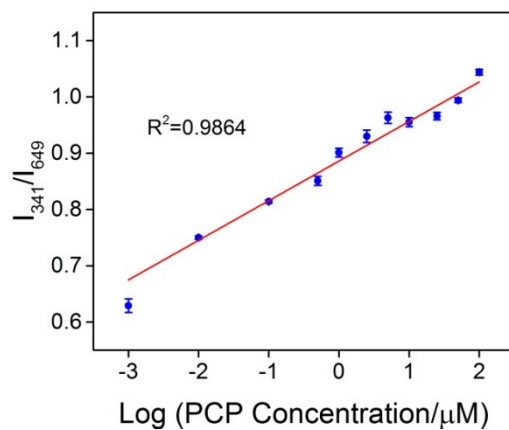

**Figure. S11** Log plot for PCP based on cysteamine-modified AuNPs substrate. The data points correspond to the average  $\pm$  standard deviation of three measurements.

## 12. Stability test of cysteamine modified-AuNPs substrate.

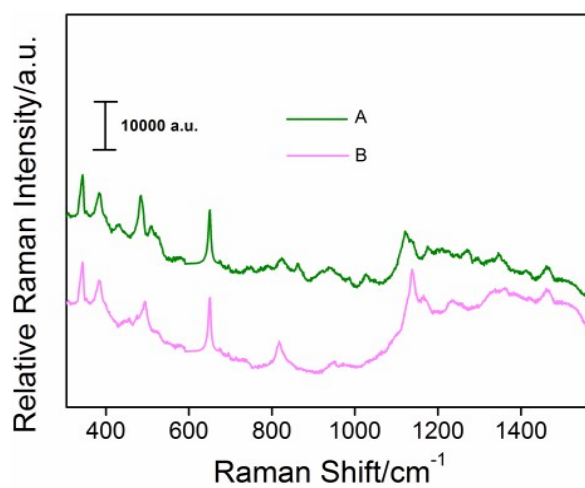



**Figure. S12** Long-term stability of cysteamine modified-AuNPs substrate. SERS spectra of 10  $\mu\text{M}$  PCP obtained from (A) the substrate immersed in the analyte solution for a month and (B) the freshly prepared substrate.

### 13. Structures of PCP and its analogues

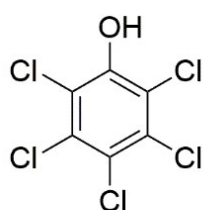

Pentachlorophenol

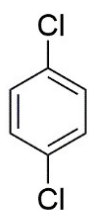

1,4-Dichlorobenzene

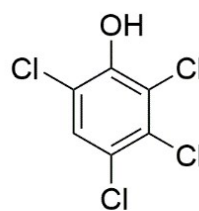

2,3,4,6-Tetrachlorophenol

**Figure. S13** Structures of PCP and its analogues.

### 14. Comparison of different methods for PCP determination.

**Table S1.** Comparison of the analytical performance of various methods for PCP determination.

| Technique                             | Linear range              | LOD                    |
|---------------------------------------|---------------------------|------------------------|
| HPLC <sup>5</sup>                     | 0.05–500 $\mu\text{g/L}$  | 6 ng/L.                |
| Fluorescent spectrometry <sup>6</sup> | 0–7.98 mg/L               | 13.3 $\mu\text{g/L}$ . |
| SERS <sup>7</sup>                     | 13.3–2660 $\mu\text{g/L}$ | 53.2 $\mu\text{g/L}$   |
| SPME-GC-MS <sup>8</sup>               | 5–40 $\mu\text{g/L}$      | 0.75 $\mu\text{g/L}$   |
| Our method                            | 2.66–2660 $\mu\text{g/L}$ | 0.511 $\mu\text{g/L}$  |

**Table S2.** Comparison the recovery and precision of this method and HPLC for the determination of PCP in real water samples.

| Technique         | Recovery (%)    | RSD (%)           |
|-------------------|-----------------|-------------------|
| HPLC <sup>1</sup> | 91 <sup>a</sup> | 3.8 <sup>a</sup>  |
| HPLC <sup>9</sup> | 80 <sup>b</sup> | 8.8 <sup>b</sup>  |
| Our method        | 95 <sup>c</sup> | 3.38 <sup>c</sup> |

a Wastewater    b River water    c Tap water

### References

1. N. L. Gruenke, M. F. Cardinal, M. O. McAnally, R. R. Frontiera, G.C. Schatza and R. P. Van Duyne, *Chem. Soc. Rev.*, 2016, **45**, 2263.
2. R. A. Álvarez-Puelbla, *J. Phys. Chem. Lett.*, **2012**, *3*, 857.

3. H. Jia, J. Zeng, W. Song, J. An, B. Zhao, *Thin Solid Films*, **2006**, 496, 281.
4. W. B. Cai, B. Ren, X. Q. Li, C. X. She, F. M. Liu, X. W. Cai, Z. Q. Tian, *Surf. Sci.* **1998**, 406, 9.
5. D. M. Han, G. Z. Fang and X. P. Yan, *J. Chromatogr. A*, 2005, **1100**, 131.
6. M. Yang, A. Han, J. Duan, Z. Li, Y. Lai and J. Zhan, *J. Hazard. Mater.*, 2012, **237-238**, 63.
7. X. Jiang, M. Yang, Y. Meng, W. Jiang and J. Zhan, *ACS Appl. Mater. Interface*, 2013, **5**, 6902.
8. I. Brás, N. Ratola and A. Alves, *J. Anal. Chem.*, 2011, **66**, 756.
9. Q. Feng, L. Zhao and J. Lin, *Anal. Chim. Acta*, 2009, **650**, 70.
